# Supplementary figures and images for: New variants of polymorphism in bananashaped mesogens with cyanosubstituted central core
Source: Royal Society of Chemistry journal article supplement (doi:10.1039/b100924i), 2001-01-01

(a)


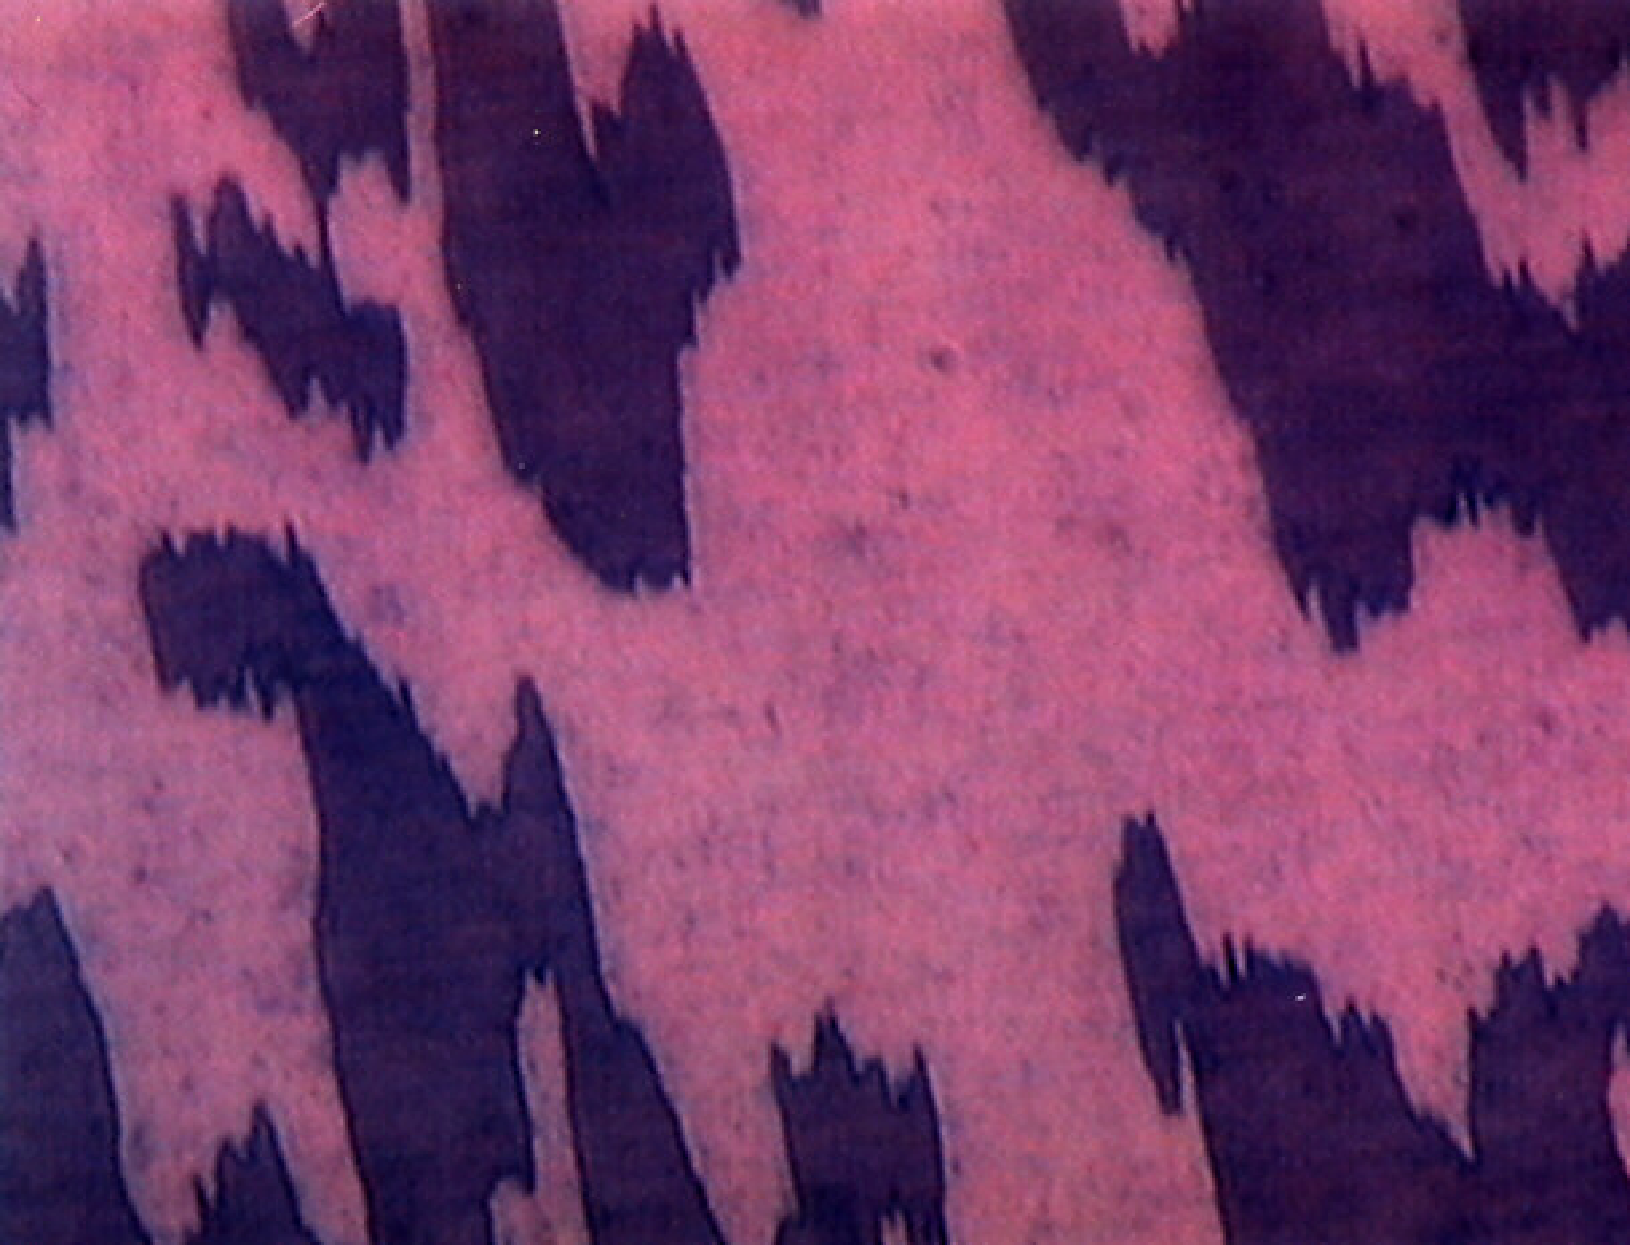


(b)


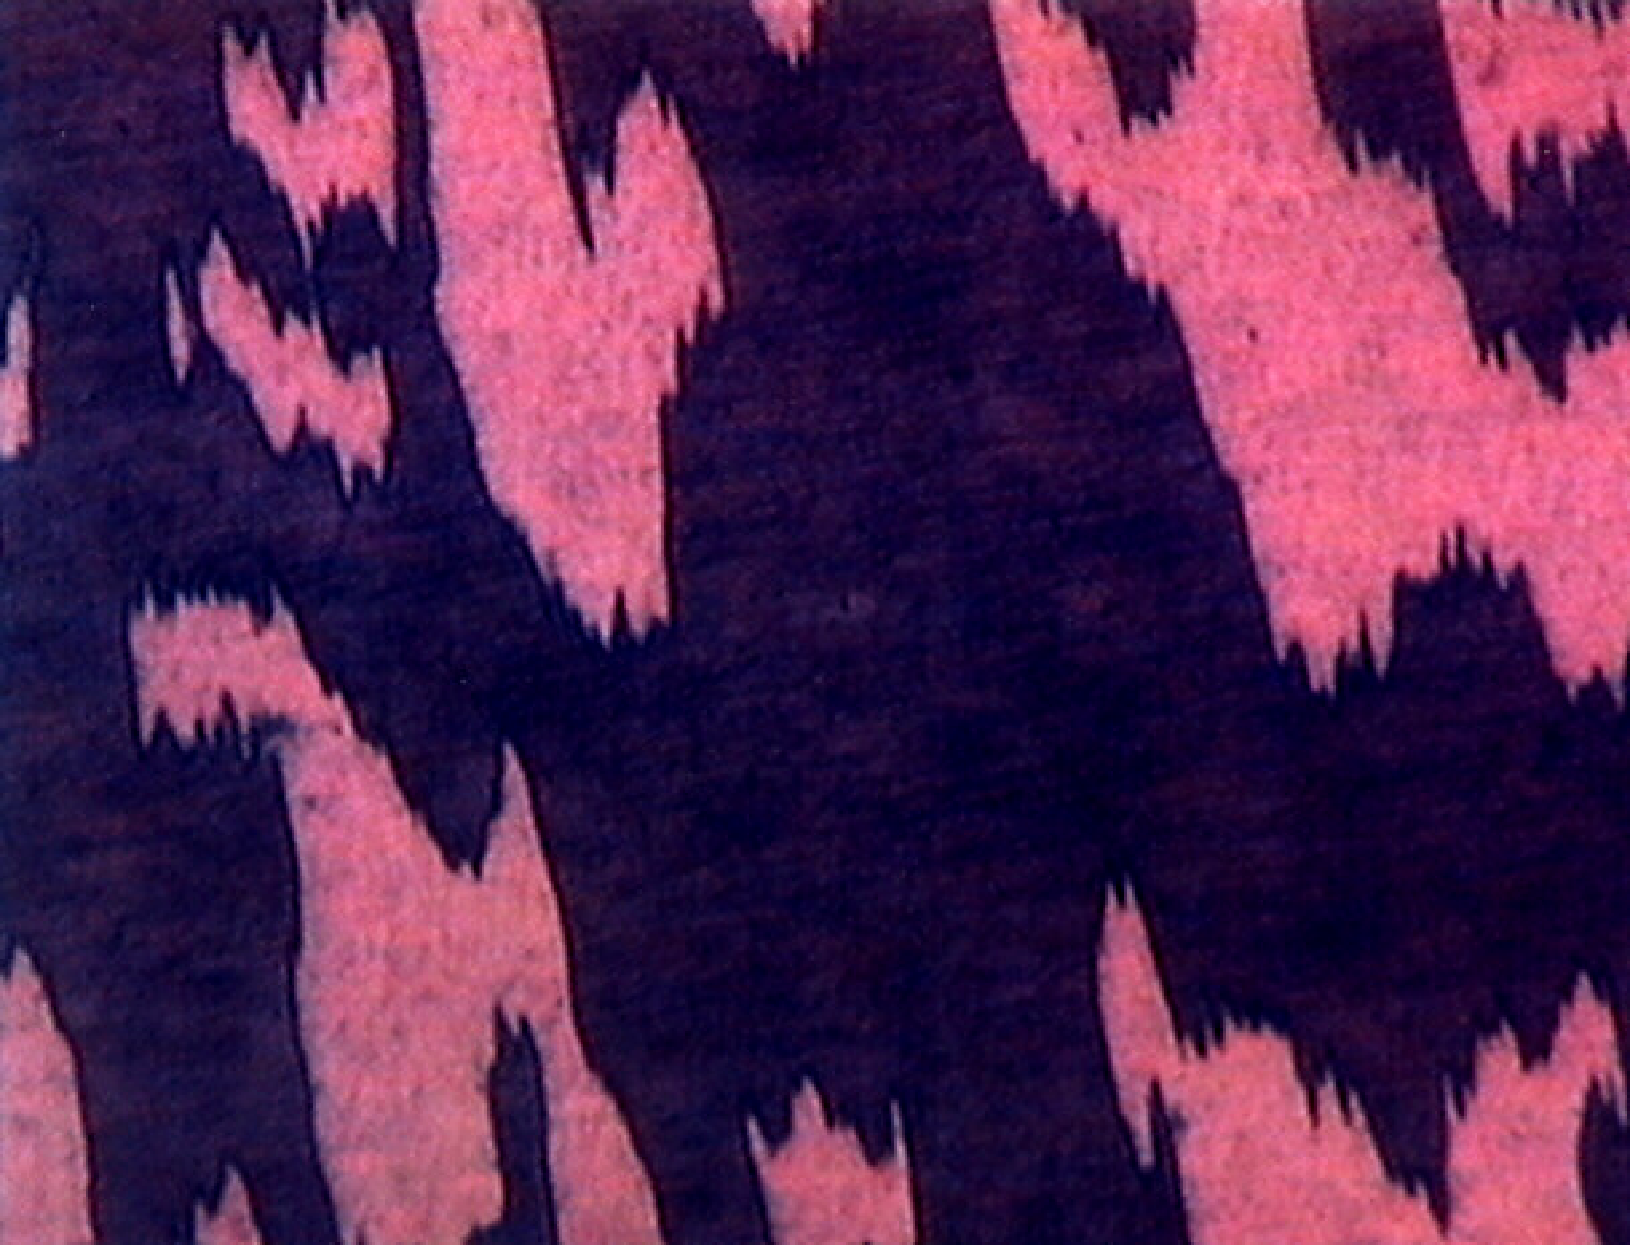

Supplement: b100924i2.doc [file b100924i2.doc]
